# Supplementary material for: Planktonic cnidarian responses to contrasting thermohaline and circulation seasonal scenarios in a tropical western boundary current system
Source: Copernicus journal article supplement (doi:10.5194/egusphere-2022-216), 2022-05-06

# Spring

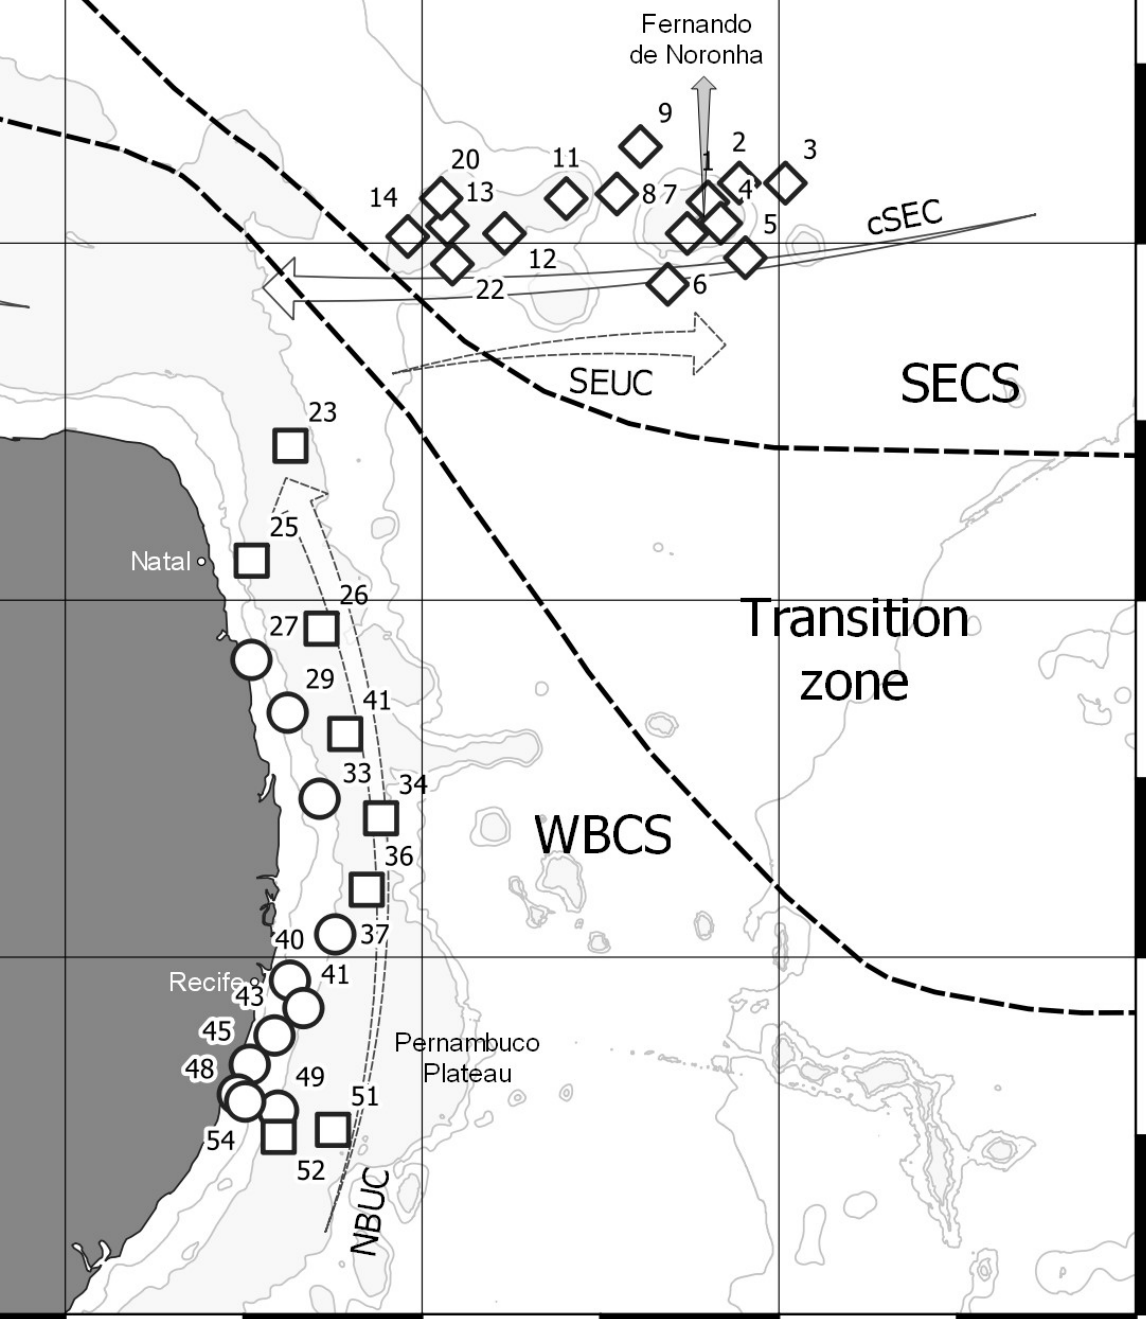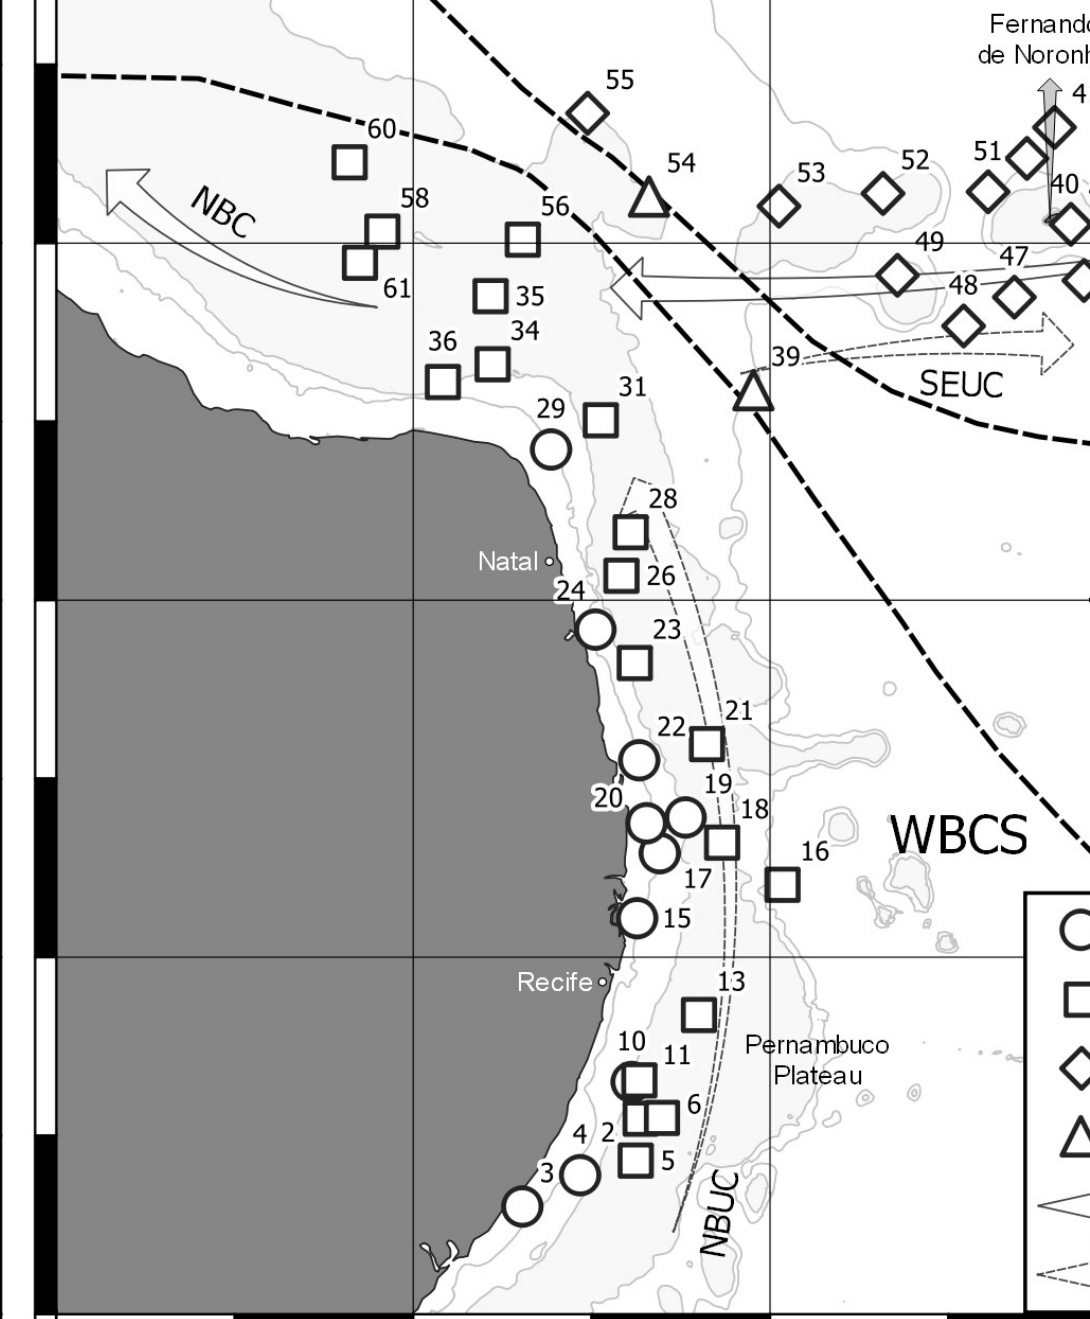

36W 34W 32W 38W 36W 34W

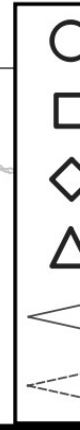

Supplement: Supplementary file [file egusphere-2022-216-AC3-supplement.pdf]
